# Supplementary material for: Regulating the coordination environment of single-atom catalysts anchored on nitrogen-doped graphene for efficient nitrogen reduction
Source: Royal Society of Chemistry journal article supplement (doi:10.1039/d4qi03239j), 2025-01-01
Supplement: d4qi03239j1.pdf [file d4qi03239j1.pdf]

**Regulating the coordination environment of single-atom catalysts anchored on nitrogen-doped graphene for efficient nitrogen reduction reaction**

Shuo Wang, Bo Zhu\*, Likai Yan\*

*Institute of Functional Material Chemistry, Key Laboratory of Polyoxometalate Science of Ministry of Education, Faculty of Chemistry, Northeast Normal University, Changchun 130024, P. R. China*

## Density functional theory calculation

### 1.1 Formation energy and binding energy of Mo-N<sub>4</sub>-SACs

The stabilities of different Mo-N<sub>4</sub>-SAC structures were quantified by calculating the formation energies ( $E_f$ ) as follows:

$$E_f = (E_{\text{Mo-N}_4\text{-SAC}} - n_C\mu_C - n_N\mu_N - n_H\mu_H - n_{\text{Mo}}\mu_{\text{Mo}})/M,$$

where is  $E_{\text{Mo-N}_4\text{-SAC}}$  the total energy of the Mo-N<sub>4</sub>-SAC, and  $n_C$ ,  $n_N$ ,  $n_H$  and  $n_{\text{Mo}}$  are the atom numbers of C, N, H and Mo.  $\mu_C$ ,  $\mu_N$ ,  $\mu_H$  and  $\mu_{\text{Mo}}$  are defined as the energies of a carbon atom in graphene, the energy of half N<sub>2</sub> molecule and H<sub>2</sub> molecule, and the energy of the isolated Mo atoms in a bulk, respectively. M is the total number of atoms in Mo-N<sub>4</sub>-SAC.

The binding energy ( $E_b$ ) of Mo atom with porous graphene is calculated according to the following equation:

$$E_b = (E_{\text{Mo-N}_4\text{-SAC}} - E_S - E_{\text{Mo}}),$$

where  $E_{\text{A-B@S}}$ ,  $E_S$ , and  $E_{\text{Mo}}$  are the energies of Mo-N<sub>4</sub>-SAC, substrate, and the isolated Mo atom, respectively.

The electrochemical stability of Mo-N<sub>4</sub>-SAC structures were evaluated by dissolution potential ( $U_{\text{diss}}$ ) which is calculated by equation:

$$U_{\text{diss}} = U_{\text{diss}}^\circ(\text{metal, bulk}) - E_f/ne,$$

where  $U_{\text{diss}}^\circ(\text{metal, bulk})$ ,  $E_f$  and  $n$  are the standard dissolution potential of bulk metal, formation energy and the number of electrons involved in the dissolution, respectively.

The  $U_{\text{diss}}$  of Mo-ACG, Mo-AC-edge, Mo-ZZG and Mo-ZZ-edge are 0.08, 0.06, 0.09, and 0.05, respectively.

The formation energies ( $E_f$ ) of the doping systems by substituting N with the O atom or S atom were calculated.  $E_f$  is defined as follows:

$$E_f = (E_{\text{O/S(1/2)-ZZ-edge}} - n_C\mu_C - n_N\mu_N - n_H\mu_H - n_{\text{Mo}}\mu_{\text{Mo}} - n_{\text{s/o}}\mu_{\text{s/o}})/M,$$

where  $E_{\text{O/S(1/2)-ZZ-edge}}$  is the total energy of O/S-doped Mo-ZZ-edge system,  $n_{\text{s/o}}$  are the atom numbers of S or O,  $\mu_{\text{S/O}}$  is the chemical potentials of single S or O atom. In addition,  $\mu_S$  is the energy per S atom in its reference phase, and  $\mu_O$  is defined as  $\mu_{\text{O}_2}/2$ .

### 1.2 Calculation method of NRR activity

The change in free energy is calculated by the following formula:

$$\Delta G = \Delta E + \Delta E_{\text{ZPE}} - T\Delta S + \Delta G_{\text{U}} + \Delta G_{\text{pH}}$$

Where  $\Delta E$  refers to the energy obtained by DFT calculation, where U is  $\Delta G_{\text{U}} = -n \times e \times U$ , the electrode potential,  $e$  is the number of transferred electrons;  $\Delta G_{\text{pH}} = -k_{\text{B}} \times T \times \ln[\text{H}^+] = -k_{\text{B}} \times T \times \text{pH} \times \ln 10$ , in this work,  $\text{pH} = 0$  was employed.  $\Delta E_{\text{ZPE}}$  is the difference between the zero point energy (ZPE) of adsorbed intermediates and gas phase intermediates,  $T$  is the temperature (298.15 K), and  $\Delta S$  is the change of entropy between the adsorption state and the gas phase.

The potential-determining step (PDS), which can be used to evaluate the catalytic activity of catalysts, is identified as the elementary reaction step with the largest increase in free energy  $\Delta G$ . The applied potential of at least  $U = -\Delta G_{\text{max}}/e$  to make every step in the hypothetical mechanism exothermal can be an estimate of the onset potential of the overall reaction.

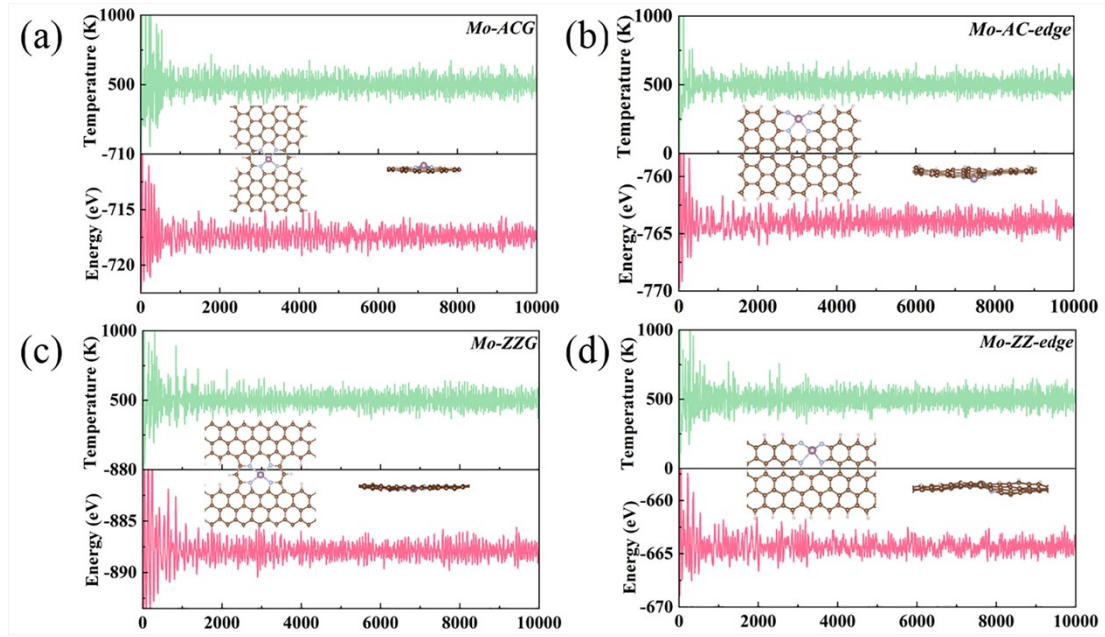

Fig. S1. Temperature and energy fluctuations of (a) Mo-ACG, (b) Mo-AC-edge, (c) Mo-ZZG, and (d) Mo-ZZ-edge. The insets illustrate the top and side view of Mo-N<sub>4</sub>-SACs after 10 ps AIMD simulation at T = 500 K.

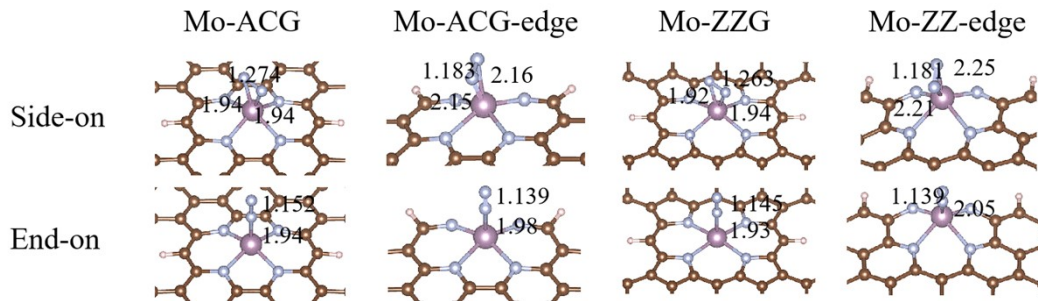

Fig. S2. Computed bond lengths of N-TM ( $d_{\text{N-TM}}$ , Å) and N-N ( $d_{\text{N-N}}$ , Å) of adsorbed N<sub>2</sub> with end-on and side-on adsorption configurations.

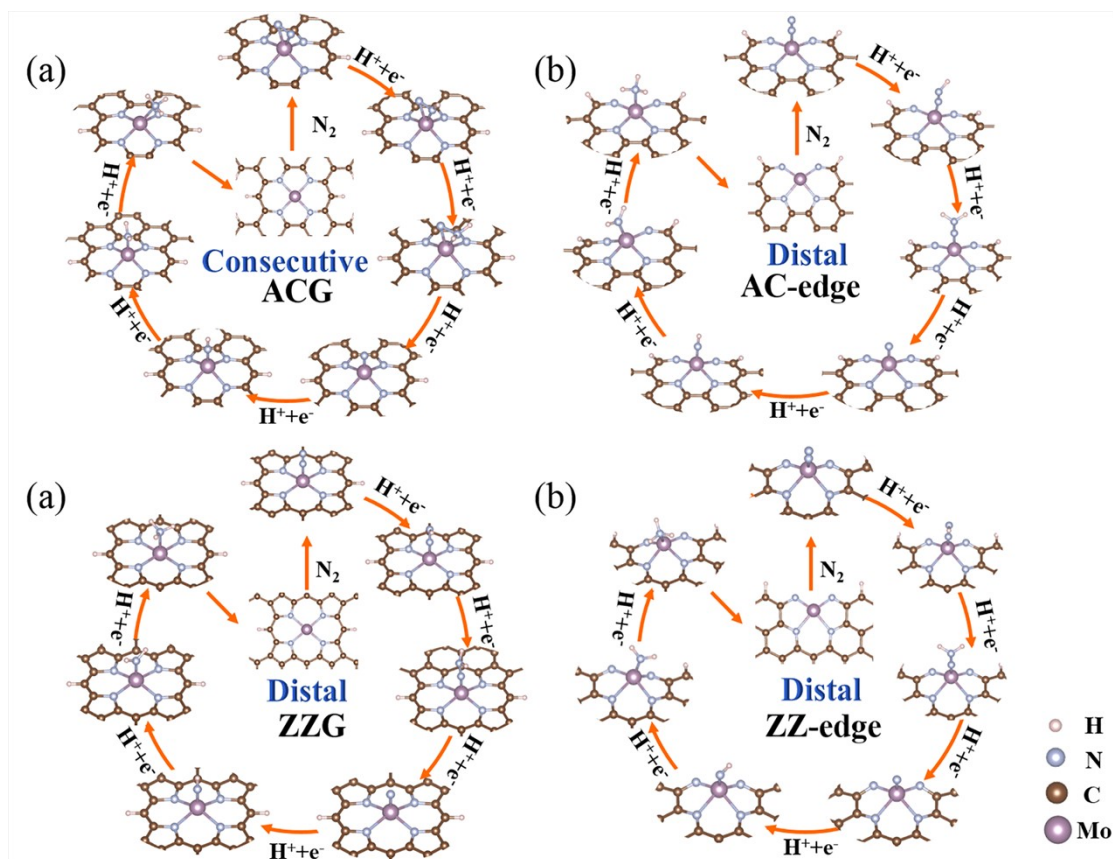

Fig. S3. Optimized structures of the involved NRR species on the (a) Mo-ACG, (b) Mo-AC-edge, (c) Mo-ZZG, and (d) Mo-ZZ-edge via the optimal pathway.

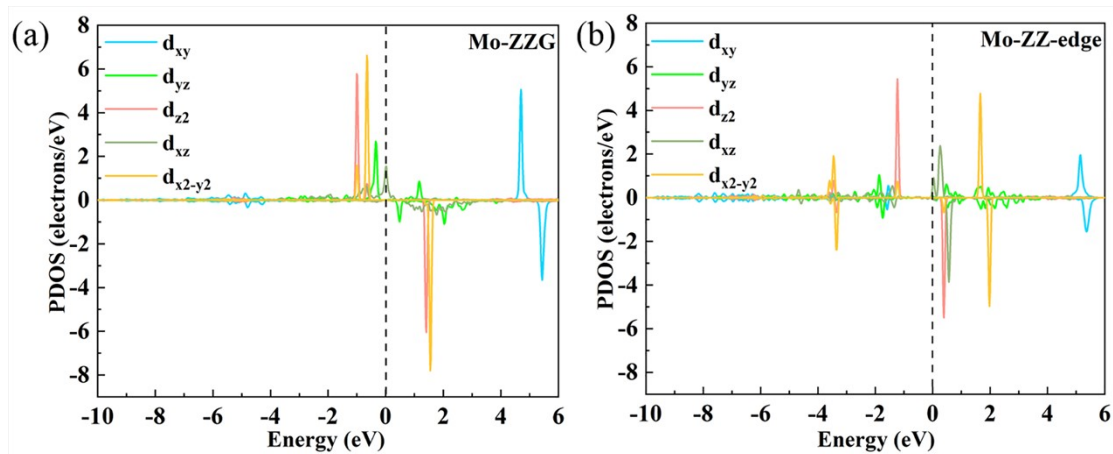

Fig. S4. Projected density of states (PDOS) of Mo 4d for Mo-ZZG and Mo-ZZ-edge. Positive and negative PDOS values represent spin-up and spin-down components, respectively.

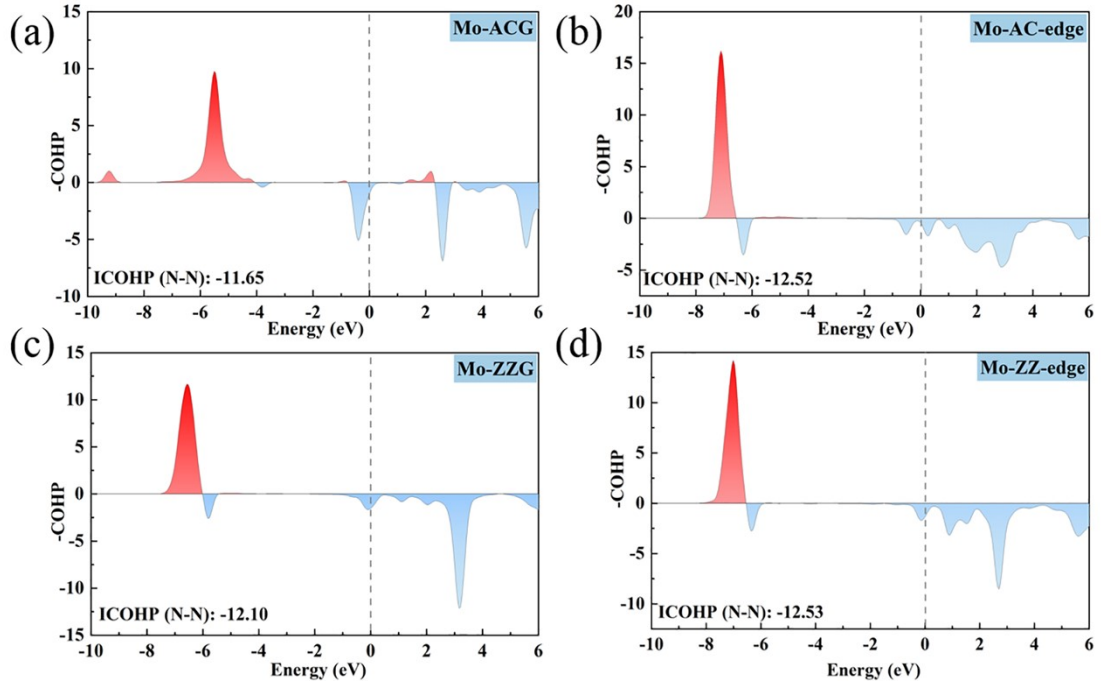

Fig. S5. Crystal orbital Hamilton population (COHP) between nitrogen atoms of  $N_2$  on (a) Mo-ACG, (b) Mo-AC-edge, (c) Mo-ZZG, and (d) Mo-ZZ-edge.

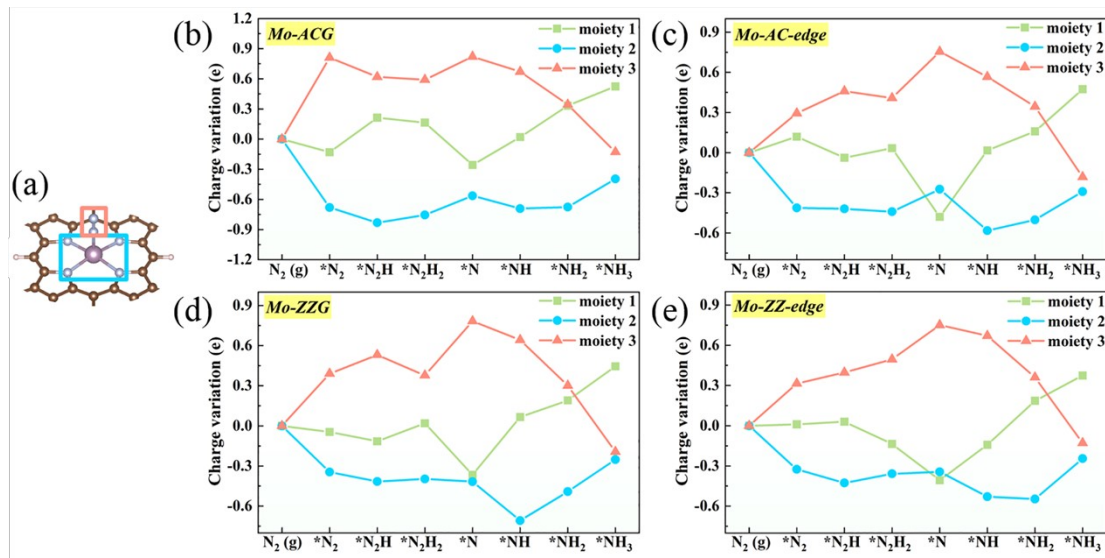

Fig. S6. (a) Schematic structure of three moieties for  $*N_xH_y$  adsorbed on Mo- $N_4$ -SACs. The charge variations of the three moieties on (a) Mo-ACG, (b) Mo-AC-edge, (c) Mo-ZZG, (d) Mo-ZZ-edge along the optimal pathway.

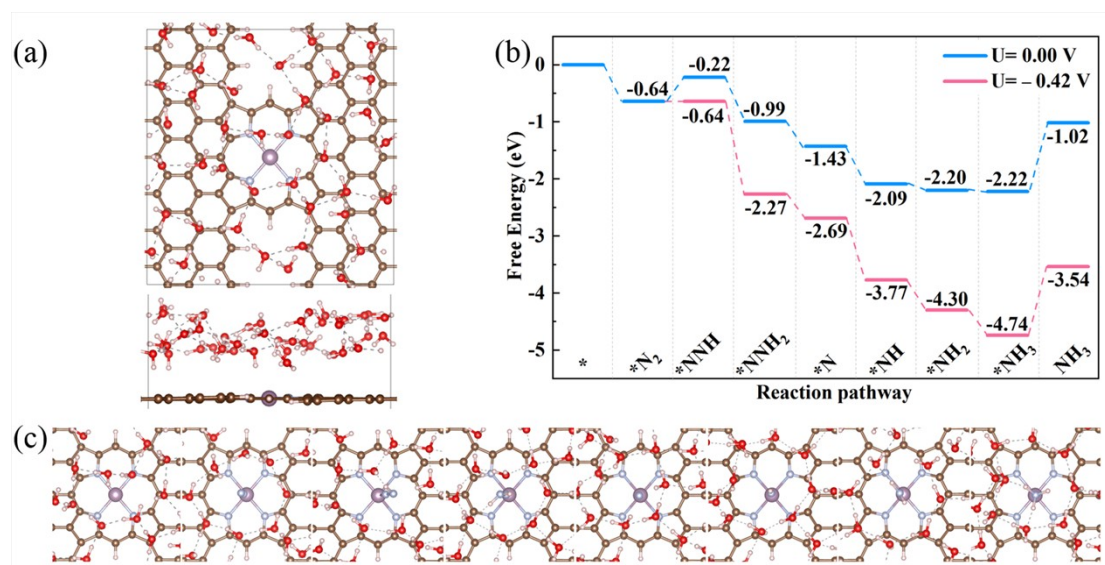

Fig. S7. Under implicit + explicit solvation condition, (a) top view and side view of Mo-ZZG; (b) Free energy diagram of NRR via the most favorable pathway on Mo-ZZG and (c) corresponding intermediate structures.

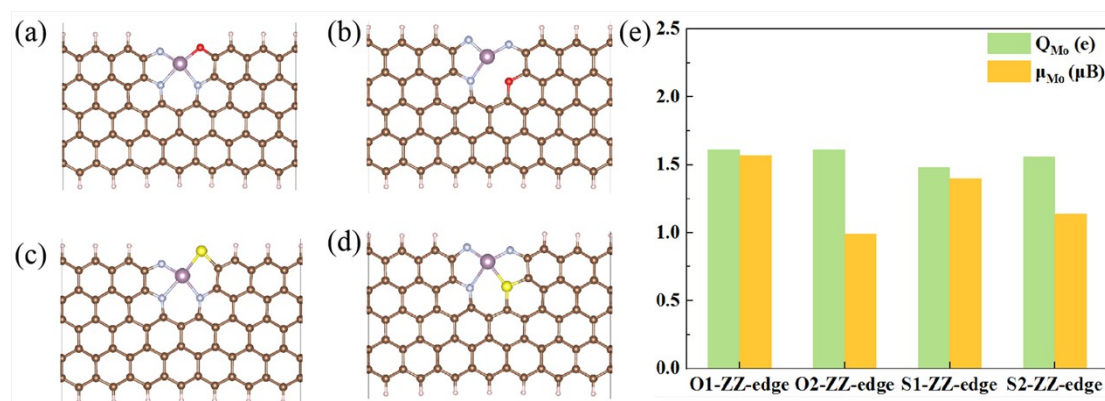

Fig. S8. (a) The optimized structural models of the O1-ZZ-edge, O2-ZZ-edge, S1-ZZ-edge, and S2-ZZ-edge. Color code: the brown, grey, purple, red, yellow, and pink balls refer to C, N, Co, O, S, and H atoms, respectively. (b) Bader charge transfer and magnetic moment of Mo atom in doped-ZZ-edge catalysts.

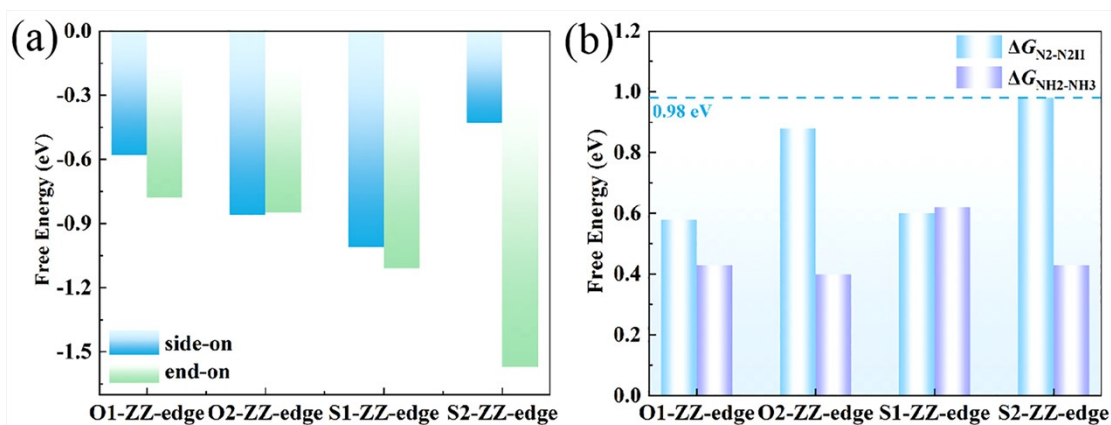

Fig. S9 (a) Gibbs free energy change  $\Delta G^*_{N_2}$ . (b) Free energy change of the first protonation step ( $\Delta G_{N_2-NH}$ ) considering end-on configurations, which is compared to the free energy change of the other crucial NRR step ( $\Delta G_{NH_2-NH_3}$ ).

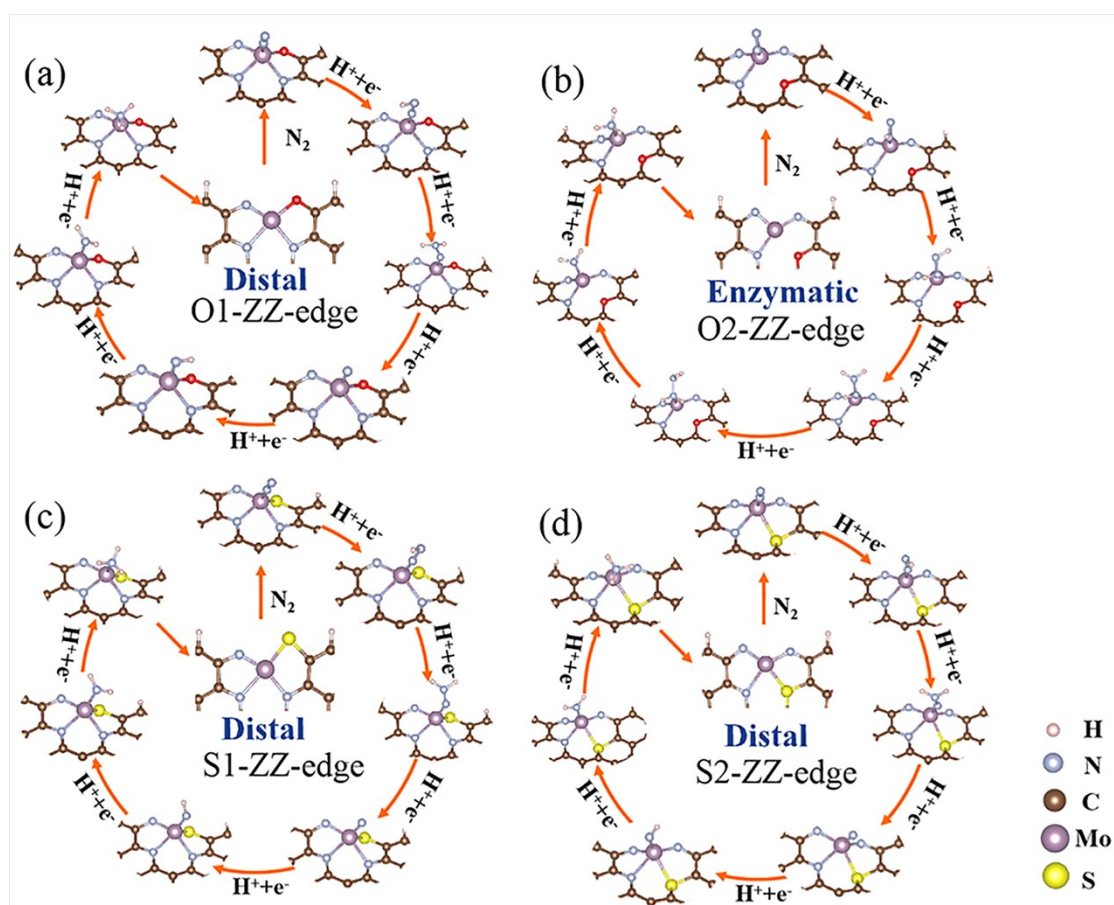

Fig. S10. Optimized structures of the involved NRR species on the (a) O1-ZZ-edge, (b) O2-ZZ-edge, (c) S1-ZZ-edge, and (d) S2-ZZ-edge.



Table S1. The calculated energy ( $E$ , eV), zero-point energy ( $E_{ZPE}$ , eV), the product (TS, eV) of temperature ( $T = 298.15$  K) and entropy (S), and Gibbs free energy ( $G$ , eV).

|                 | $E$    | $E_{ZPE}$ | TS   | $G$    |
|-----------------|--------|-----------|------|--------|
| N <sub>2</sub>  | -16.64 | 0.15      | 0.59 | -17.08 |
| H <sub>2</sub>  | -6.77  | 0.28      | 0.42 | -6.91  |
| NH <sub>3</sub> | -19.73 | 0.91      | 0.60 | -19.42 |
